# Supplementary material for: Biochemical and molecular characterization of N66 from the shell of Pinctada mazatlanica
Source: PeerJ journal article supplement (doi:10.7717/peerj.7212), 2019-06-27
Supplement: Supp_File.pdf [file Supp_File.pdf]

N66 nucleotide sequence

TATGTGGAGAATGACGACGCTTCTTCACTTGACTGCTCTGCTTGTTCTGATTCCATTATGTCATTGTGCCT  
CCATGCACAGGCATGACCATTATATGGACATGGATCAAACCTACCGTGATCGATGGGGAAACTGTCATTATCAGG  
GGGAAGTAGCTGTGACGCCGGTTTTAGCTACAATAGGGAACAAAATGAGGAACAATGCCACGGCCGTATGACT  
GGCACACTATATCTAGTTGCTTTAAGGCATGTGGAAGTAAAGAGAGACAATCACCAATCAACATTTGGTCACATAG  
AGCCCTTTCCGAAAACCTGCCAAGACTGAAATTCAGCCACATATGAAATCATTGGATACGAAAGTGTCAAATCAC  
CAAAATCATGCCCTGAATTCGATTCTGAGGACGAAAACTTCATGTTAAACTGAAGAACTTGTTGATGGACATT  
ATAAATTCGCAATCTCCATATTCACATTGGCAAAAGTAGACGAAAGGGCTCCGAACACAGCGTTGACAGACATTT  
TACACCTATGGAGGCTCATTTAGTGTTCCATCATGATGAGAAAAAGGAAATCAAACCTCCTAGGATTCCGTTAGGA  
AGAAATTTCAAGTGGTATTAATGAATTTGTTGTCGTTGGGGTTTTCTAGAGGATGGTGATGAAGGATACGGTGATG  
AACCGGACGACTATGAATGTAAGCGCATATTAAGGGTTCATTACGATCATTGCGACAACAATGGAGACAACG  
GTTACAACGTGTATAACGGCAACAATGAAAACAACGGAAACAATGGTAATGGTAACAACGGCTATAACGGT  
AACAACGGTTATAACGGTAATAACGGTGACAATGGCAACAGTGGAAACAATGGTAATGGTAACAACGGTTA  
TAACGGTGACAATGGCAACAGCGGAAACAATGGTAATGGTAACAACGGTAATAACGGTAATAACGGTGCC  
AACGGAAACAACAGAAACAATGGTAATGGTAACAACGGTTATAACGGTAATAACGGTGATAATGGCAACAA  
CGGAAACAATGGTAATGGTAACAACGGAAATAATGGTAATGGTAACAACGGAAATAACGGTGGAATGGC  
AACAACGGAAACAATGGTAATGGTAACAACGGAAATAATGGTAATGGTAACAACGGGAATAACGGTGGA  
ATGGCAACAATGGTAATGGTAACAATGGAAGTAATGGTAACGGTGACTACGGTAGTAATGGTAACAATGGT  
GGAAACGGGAACAATGGTAATAACGGTGATAACGGTAATGGCGACAATGGTTATAACGGTGATAATGGTA  
ACAGTGACGGGCGACTCAGACGTTGGGACTTGAAAAATGTCCGCCGATTCATACCGAGCGATATCACAT  
CAGCGGAAGATGTATTGTCAAAAAAGCAAAACGCCCTCAGCAGGATTCTCGAATGCGCATATAGACACAAAA  
AAGTCAGAGAATTCAAAAGGAATGGAGAACACAAAAGTCTTGATGTTGAAATTACACCGGAAATGGTTCTA  
CCGCCAATAAAATACAGACAATACTATACCTATGAAGGATCTTTGACAACCCCTCCTTGACAGAGAGCGT  
CCGTTGGGTTGTAGAAAAATGCCACGTGCAAGTATCCAGAAGGGTGCTTGATGCATTGCGGAAGGTGCGAA  
GGATATGATGATGGTACCAGTTTTGAGCAAGTATGGAACAAGACGTCCACACAGAGAAACATAAAACCT  
GTACCTGTGTACAAAACTTTATATGAGA

N66 Protein sequence (576 aa)

MWRMTLLHLTALLVLIPLCHCASMHRHDHYMDMDQTYRDRWGNCHYSGSSCDAGFSYNREQNEEQCHGPYD  
WHTISSCFKACGSKERQSPINIWSHRALFRKLPRKFKPHMKSLDTKVSNHQNHAFEDSEDEKLHVKLKLVLDGHYKF  
RNLHIHIGKSRRKGEHSVDRHFTPMEAHLVFHHDEKKEIKPPRIPLGRNFSGINEFVVVGVFLEDGDEGYGDEPDDYEC  
KRILKGHYDHCNNGDNGYNCDNNGNENNGNNGNNGYNGNNGYNGNNGDNGNSGNNNGNNGNNGYNGDNG  
NSGNNNGNNGNNGNNGNNGNNGNRRNNGNNGYNGNNGDNGNNGNNGNNGNNGNNGNNGNNGNNGNNGNNGNNGN  
GNNNGNNGNNGNNGNNGNNGNNGNNGNNGNNGNNGNNGNNGNNGNNGNNGNNGNNGNNGNNGNNGNNGNNGN  
GNSDGRLLRRWDLENVRRIHTEYHISGRIVKAKRLSRILECAYRHKKVREFKRNGEHKSLDVEITPEMVLPIKYRQYY  
TYEGLTTPCTESVRWVVEKCHVQVSRRLDALRKVEGYDDGTTFEQVWKQDVPHRET
